# Supplementary material
Source: HighWire-hosted journal article supplement (http://dmd.aspetjournals.org/highwire/filestream/79758/field_highwire_adjunct_files/7/1087_supp_table4.pdf)
Supplement: 1087_supp_table4.pdf [file 1087_supp_table4.pdf]

**Metabolic disposition of triazolam and clobazam in humanized CYP3A mice with a double knockout background of mouse *Cyp2c* and *Cyp3a* genes**

Kaoru Kobayashi, Genki Minegishi, Nina Kuriyama, Atsushi Miyajima, Satoshi Abe, Kanako Kazuki, Yasuhiro Kazuki

Drug Metabolism and Disposition

Manuscript Number: DMD-AR-2022-001087

Supplemental Table 4. Expression levels of mRNAs in the liver and intestine of WT, 3aKO, 2c3aKO, hCYP3A/3aKO and hCYP3A/2c3aKO mice.

|           | Genes   | WT          | 3aKO        | 2c3aKO                                     | hCYP3A/3aKO               | hCYP3A/2c3aKO            |
|-----------|---------|-------------|-------------|--------------------------------------------|---------------------------|--------------------------|
| Liver     | CYP1A2  | 1.00 ± 0.05 | 0.90 ± 0.32 | 1.00 ± 0.18                                | 0.80 ± 0.21               | 0.90 ± 0.25              |
|           | CYP2B10 | 1.00 ± 0.70 | 2.74 ± 1.39 | 12.46 ± 4.55 <sup>**</sup> , <sup>††</sup> | 1.58 ± 0.53               | 4.90 ± 0.57 <sup>§</sup> |
|           | UGT1A1  | 1.00 ± 0.12 | 1.31 ± 0.11 | 1.72 ± 0.09 <sup>*</sup>                   | 1.86 ± 0.21 <sup>**</sup> | 1.42 ± 0.38              |
|           | Mdr1a   | 1.00 ± 0.19 | 2.39 ± 0.78 | 5.94 ± 2.17 <sup>**</sup>                  | 2.17 ± 0.18               | 2.49 ± 1.38              |
| Intestine | CYP2B10 | 1.00 ± 0.19 | 0.80 ± 0.39 | 0.61 ± 0.16                                | 0.26 ± 0.24               | 0.74 ± 0.26              |
|           | UGT1A1  | 1.00 ± 0.77 | 0.82 ± 0.21 | 0.85 ± 0.13                                | 0.53 ± 0.51               | 0.85 ± 0.45              |
|           | Mdr1a   | 1.00 ± 0.78 | 1.70 ± 0.61 | 2.89 ± 0.64                                | 0.99 ± 0.68               | 1.92 ± 0.86              |

The mRNA expression levels were normalized by expression levels of GAPDH mRNA. Data for each mouse (n = 3/group) are shown as means with S. D.

\*p<0.05, \*\*p<0.01 compared with WT, ††p<0.01 compared with 3aKO, §p<0.05 compared with 2c3aKO (one-way ANOVA with a post-hoc test of Scheffé's F test).
